# Supplementary material
Source: publisher figshare collection journal article supplement (https://asha.figshare.com/articles/dataset/_/12149703)
Supplement: Supplementary file 1 [file 1]

## **Supplemental Material S1. Email Cover Letter and Informed Consent Procedures**

Dear Graduate Program Department Head,

Graduate student XX, in the Department of Communication Sciences and Disorders at the University of XX, is conducting a Fall 2017 research study entitled "Survey of Counseling Courses in Communication Sciences and Disorders Graduate Programs." This study is being conducted under the supervision of XX. The primary purpose of this survey research is to gain a better understanding of the extent to which counseling is being incorporated into graduate programs. This survey will be beneficial to the field of Speech Language Pathology by identifying current extents and natures of counseling training graduate students are receiving in their programs. Speech Language Pathologists are asked to use a variety of counseling skills in practice, and we aim to discover how much training they are receiving to do so. The survey asks one question about the region you are located. The survey then asks a variety of questions relating to counseling courses or training in your graduate program. It should take approximately 15-20 minutes to complete.

You are receiving this email because you are listed on the contact list of ASHA accredited graduate programs. Below is a link to the Qualtrics survey. By clicking on the anonymous link to the survey, you are giving your informed consent to participate. You must be at least 18 years old to participate. No identifying information is solicited and your participation will remain anonymous. Benefits of participation in this survey include improving knowledge in this subject area of our field, and helping structure future research. No risks are anticipated. Participation is completely voluntary and you may withdraw from the survey at any time. The survey will close on (DATE – 2 months after initial email is sent out).

Participation in the Qualtrics survey will involve answering several multiple choice and short answer questions about the extent to which you offer counseling classes or training in your graduate program.

I understand that if I have any questions concerning the purposes or procedures associated with this research project, I may call or write:

I understand that if I have any questions or concerns about the treatment of human subjects in this study, I may call or write:

Institutional Review Board for Protection of Human Subjects

If interested, please respond to the following questions of the Qualtrics Survey that is linked below.

*Qualtrics Survey Link*
