# Supplementary material
Source: publisher figshare collection journal article supplement (https://asha.figshare.com/articles/dataset/_/12149703)
Supplement: Supplementary file 2 [file 1]

### Supplemental Material S3. Counseling Textbooks

Adler, R. B., Rosenfeld, L. B., & Proctor, R. F. (2007). *Interplay: the process of interpersonal communication* (10th ed.). New York, NY: Oxford Press.

Clark, J. G., & English, K. M. (2013). *Counseling-infused audiologic care*. Upper Saddle River, NJ: Pearson Higher Ed.

DiLollo, A., & Neimeyer, R. A. (2014). *Counseling in speech-language pathology and audiology: Reconstructing personal narratives*. San Diego, CA: Plural Publishing.

Flasher, L. V. & Fogle, P. T. (2012). *Counseling skills for speech-language pathologists and audiologists* (2nd Ed.). Clifton Park, N.Y: Delmar.

Harris, R. (2009). *ACT made simple: An easy-to-read primer on acceptance and commitment therapy*. Oakland, CA: New Harbinger Publications.

\*Holland, A.L. (2014). *Counseling in communication disorders: A wellness perspective* (2nd ed.). San Diego, CA: Plural Publishing \*Multiple Editions

Lubinski, R., and Hudson, M.W. (2013). *Professional issues in speech-language pathology and audiology* (4th ed.). Clifton Park, NY: Delmar Cengage Learning.

\*Luterman, D. (2016) *Counseling persons with communication disorders and their families* (6th ed.). Austin, TX: Pro-ed. \*Multiple Editions

McMorrow, M. J. (2003). *Getting ready to help: A Primer on interacting in human service*. Baltimore, MD: Paul H. Brookes.

Miller, W. R., & Rollnick, S. (2012). *Motivational interviewing: Helping people change* (applications of motivational interviewing). New York, NY: Guilford Press.

Payne, R. (2013). *A framework for understanding poverty: A cognitive approach*. Highlands, TX: Aha Process Inc.

Reed, H. C. (2011). *The source for counseling for SLPs*. East Moline, IL: LinguaSystems.

Shipley, K. G., & Roseberry-McKibbin, C. (2006). *Interviewing and counseling in communicative disorders* (3rd ed.). Austin, TX: Pro-Ed.

Stein-Ruben, C., & Adler, B. T. (2016). *Counseling in communication disorders: Facilitating the therapeutic relationship*. Thorofar, NJ: Slack Inc.

Stewart, J. R. (Ed.). (1990). *Bridges not walls: A book about interpersonal communication*. New York, NY: McGraw-Hill.

Tellis, C. M., & Barone, O. R. (2018). *Counseling and interviewing in speech-language pathology and audiology*. Burlington, MA: Jones & Bartlett Learning.

Webster, E. J. (1977). *Counseling with parents of handicapped children: Guidelines for improving communication*. New York, NY: Grune & Stratton.

Ziviani, J., Poulsen, A. A., & Cuskelly, M. (Eds.). (2013). *The art and science of motivation: A therapist's guide to working with children*. Philadelphia, PA: Jessica Kingsley.

Journal articles that pertain to the topics.

A variety of readings from texts and journal articles.
