# Supplementary material
Source: publisher figshare collection journal article supplement (https://asha.figshare.com/articles/dataset/_/12149703)
Supplement: Supplementary file 3 [file 1]

## Supplemental Material S2. Counseling Curriculum Survey

### Q1 Regions

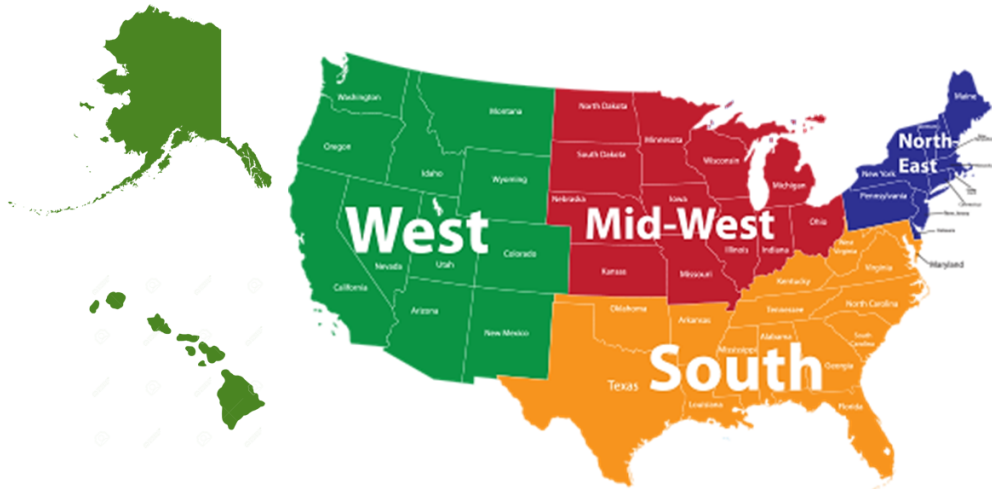

Q2 Given the image above, please identify the region where your program is located.

- ☐ West
- ☐ Midwest
- ☐ South
- ☐ Northeast

Q3 Do you offer a stand-alone course in counseling within your graduate program?

- ☐ Yes
- ☐ No

Q4 If you offer a course in counseling, is it a required or elective course?

☐ Required

☐ Elective

---

Q5 If you offer a course in counseling, how many credits?

☐ 1

☐ 2

☐ 3

☐ 4

☐ other: \_\_\_\_\_

---

Q6 If you offer a course in counseling, is it offered through the CSD department or another department? If another department, which one?

☐ CSD

☐ Other department: \_\_\_\_\_

---

Q7 If you offer a course in counseling, is counseling also embedded within other courses within the curriculum? If so, how?

☐ Yes, how: \_\_\_\_\_

☐ No

---

Q8 If you offer a course in counseling, approximately how many years have you offered it?

---

Q9 If you offer a course in counseling, what textbook(s) do you use?

---

Q10 If you offer a course in counseling, please share your learner outcomes below (enter one per line, unless you need more than 5; if you have <5, enter whatever you have):

☐ Learning outcome 1 

---

☐ Learning outcome 2 

---

☐ Learning outcome 3 

---

☐ Learning outcome 4 

---

☐ Learning outcome 5+ 

---

Q11 If you do NOT offer a course in counseling, have you offered one in the past?

☐ Yes

☐ No

Q12 If you do NOT offer a course in counseling, is counseling embedded within other courses within the curriculum? If so, how?

☐ Yes, how: 

---

☐ No

Q13 Any additional comments:

---

---

---

---

---
